# Supplementary material for: Clinical Findings of COVID-19 Patients Admitted to Intensive Care Units in Guangdong Province, China: A Multicenter, Retrospective, Observational Study
Source: PubMed Central journal article supplement (PMC7604321; doi:10.3389/fmed.2020.576457), 2020-10-19

Figure S1

A

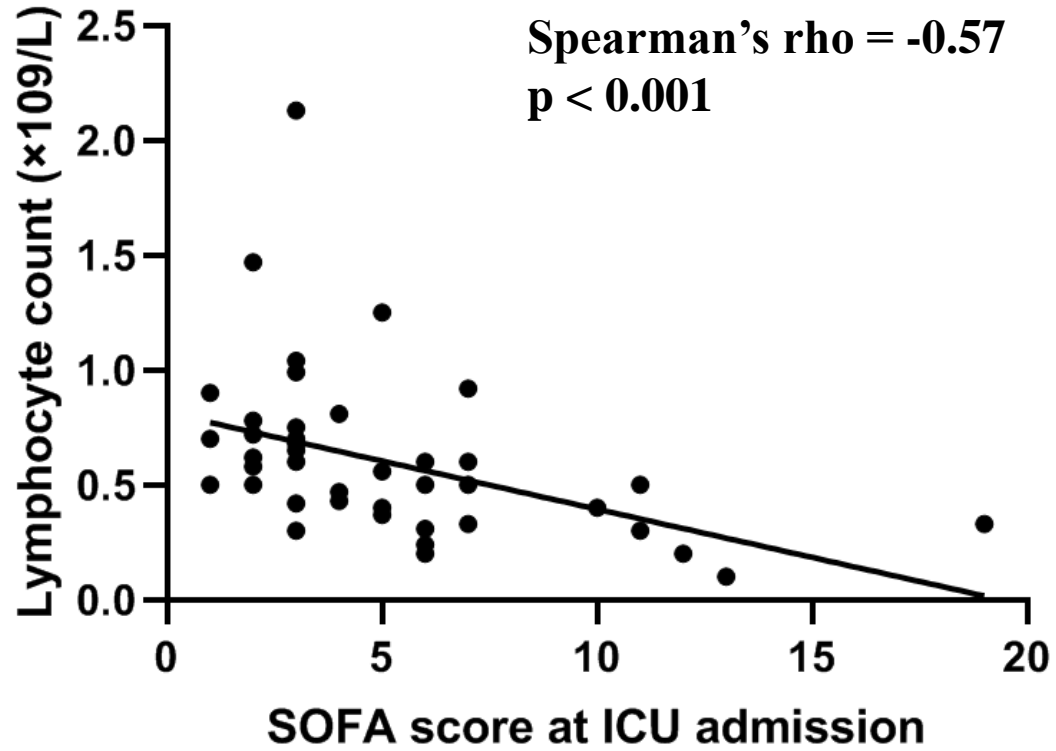

B

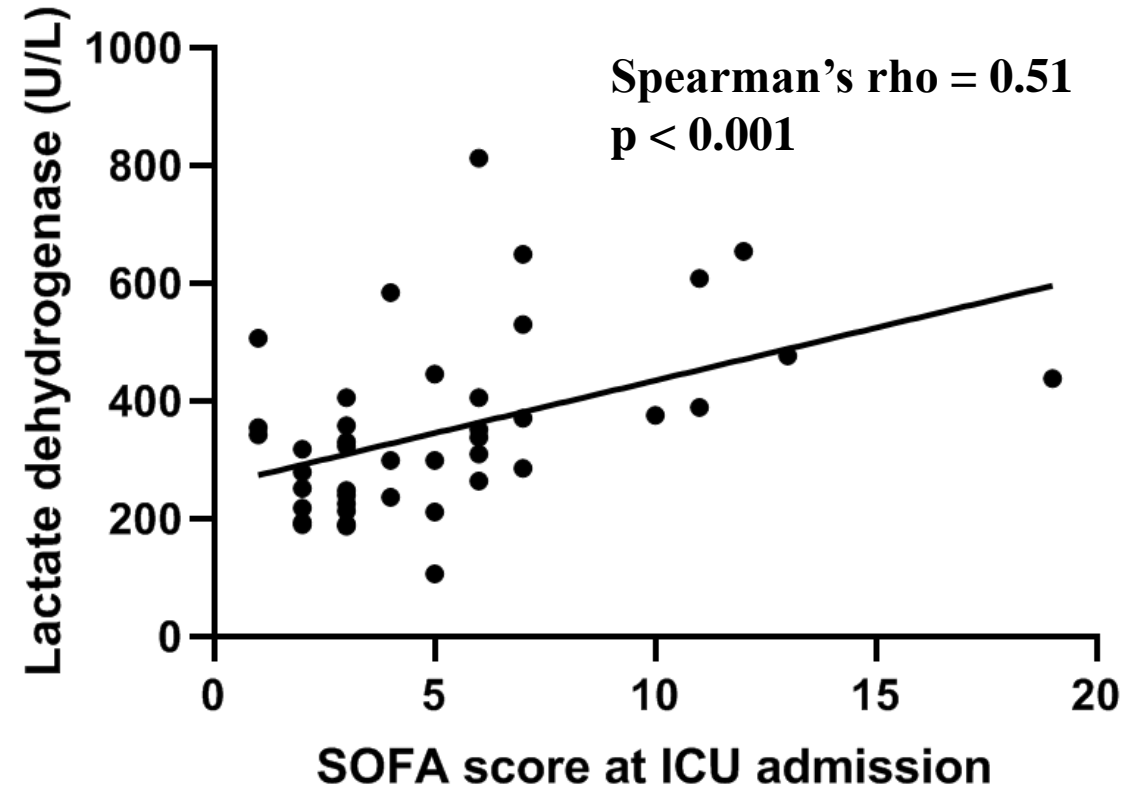

Supplement: Image_1.pdf [file Image_1.pdf]
